# Supplementary material for: mRNA vaccination compared to infection elicits an IgG-predominant response with greater SARS-CoV-2 specificity and similar decrease in variant spike recognition
Source: PubMed Central journal article supplement — medRxiv. 2021 Apr 7:2021.04.05.21254952. Preprint. [Version 1] doi: 10.1101/2021.04.05.21254952 (PMC8043478; doi:10.1101/2021.04.05.21254952), 2021-04-07
Supplement: NIHPP2021.04.05.21254952-supplement-1.pdf [file NIHPP2021.04.05.21254952-supplement-1.pdf]

348 Supplemental Figures

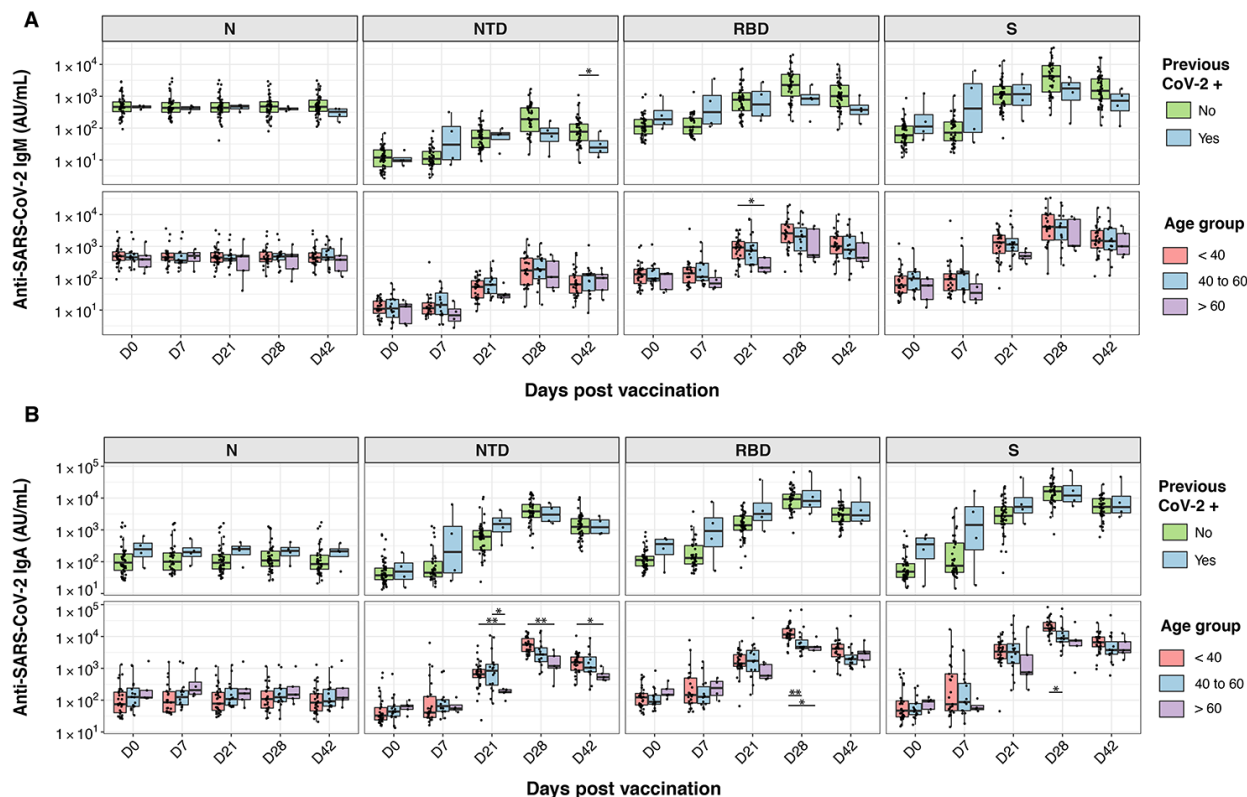

349  
350 **Figure S1: BNT162b2 vaccination induces variable and relatively low anti-SARS-CoV-2 IgM**  
351 **and IgA concentrations.** Anti-SARS-CoV-2 N, NTD, RBD, and S IgM (A) and IgA (B) antibody  
352 responses are shown for 257 plasma samples from 55 individuals who received BNT162b2 prime  
353 (day 0) and boost (day 21) vaccination doses. Box-whisker plots of the MSD AU/mL anti-SARS-  
354 CoV-2 IgG concentrations show the interquartile range as the box and the minimum and maximum  
355 values as the ends of the whiskers. Statistical tests: two-sided Wilcoxon rank sum test (A and B,  
356 top panels) and pairwise Wilcoxon rank sum test with Bonferroni correction (A and B, bottom  
357 panels). \* =  $P < 0.05$ , \*\* =  $P < 0.01$ , \*\*\* =  $P < 0.001$ .

358

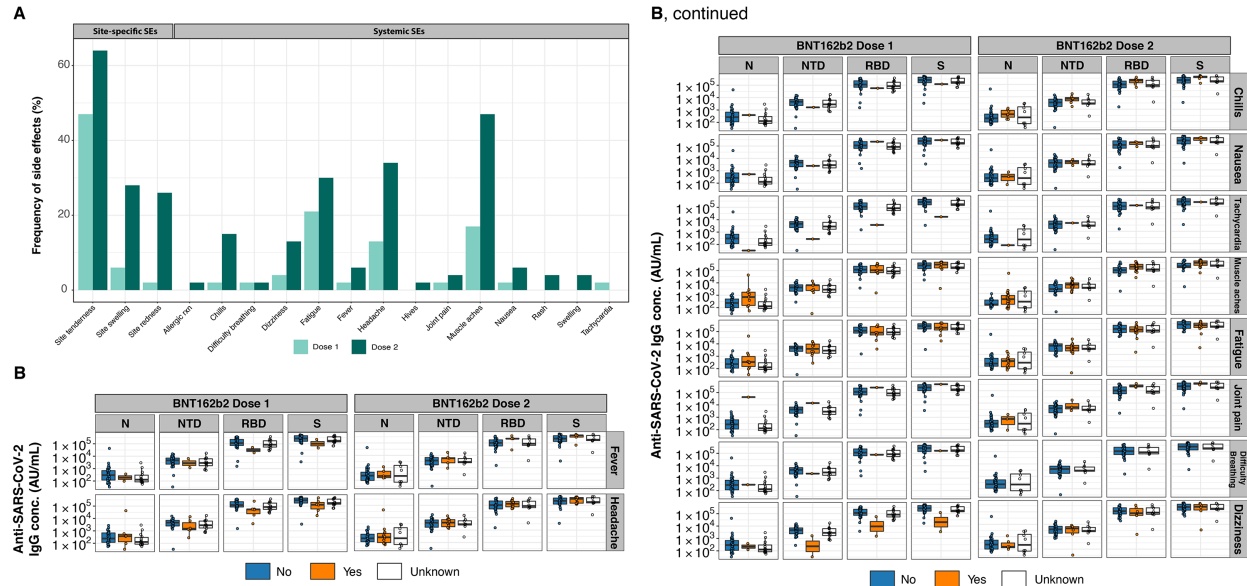

359

360 **Figure S2: The magnitude of antibody responses is not correlated with reported vaccine-**  
 361 **associated side effects (SEs).** (A) Frequency of vaccine-associated side effects after the prime  
 362 (light green) and boost (dark green) vaccination dose. (B) Box-whisker plots of the MSD AU/mL  
 363 anti-SARS-CoV-2 IgG concentrations show the interquartile range as the box and the minimum  
 364 and maximum values as the ends of the whiskers. For a given SE (horizontal panels), vaccinees  
 365 were grouped according to no SE reported (“No”, colored in blue) or SE reported (“Yes”, colored  
 366 in orange). Vaccinees where SEs were unknown are shown as white boxplots.

367

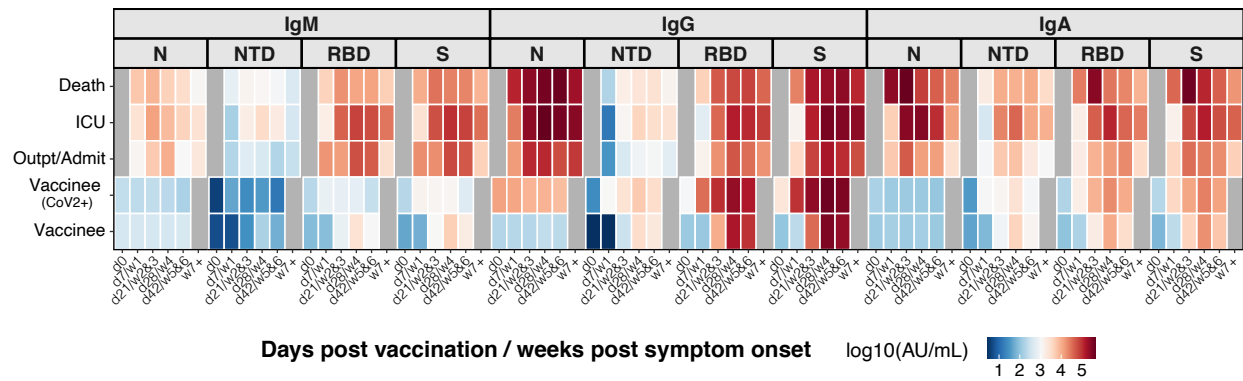

368

369 **Figure S3: BNT162b2 vaccination and SARS-CoV-2 infection elicit divergent Ig isotype**  
 370 **profiles.** Anti-SARS-CoV-2 N, NTD, RBD, and S IgM, IgG, and IgA antibody responses are  
 371 shown for individuals who received BNT162b2 prime (day 0) and boost (day 21) vaccination doses  
 372 and for COVID-19 patients. The heatmap shows the development of antibody responses in  
 373 longitudinal samples from vaccinees/patients collected at / during day 0, day 7 / week 1, day 21 /  
 374 weeks 2&3, day 28 / week 4, day 42 / weeks 5&6, and week 7 and later after vaccination / COVID-  
 375 19 symptom onset (x-axis). Individuals were classified as outpatients (Outpt) and hospital admitted  
 376 patients (Admit); intensive care unit (ICU) patients, those who died from their illness (Death) and  
 377 vaccinees who did (CoV-2+) or did not have a positive SARS-CoV-2 test in the past. **Mean** values  
 378 (as opposed to the **Median** values shown in the main Figure 2) of log<sub>10</sub> MSD arbitrary unit  
 379 (AU)/mL concentrations were used to display a color code for each of the study groups.

380

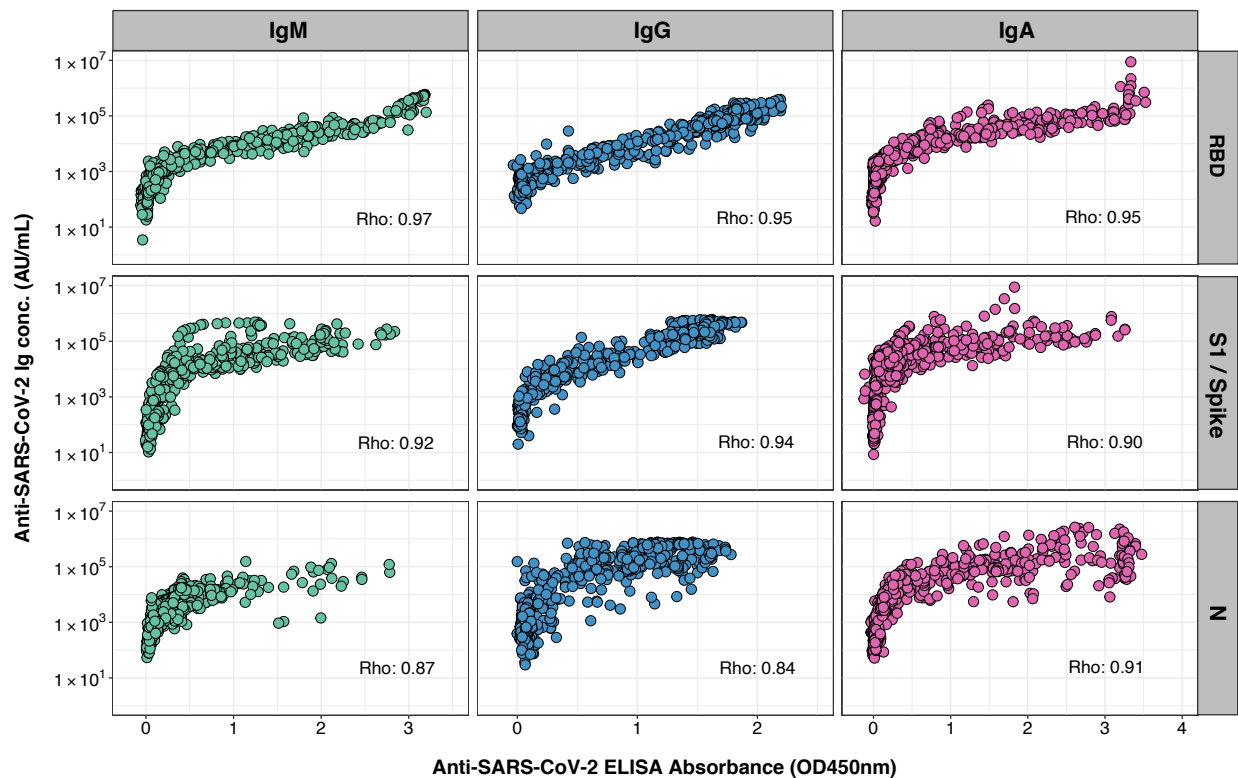

381

382 **Figure S4: Correlation of anti-SARS-CoV-2 ELISA and ECL results.** Anti-SARS-CoV-2  
383 RBD, S1/S, and N IgM, IgG, and IgA antibody responses were measured in 530 plasma samples  
384 from 100 COVID-19 patients by ELISA and MSD ECL assays. ELISA versus MSD RBD and N  
385 assay results and ELISA S1 versus MSD S assay results were highly correlated. Spearman rank  
386 correlation (coefficient = Rho, displayed in the plot for each assay comparison) was used to assess  
387 the strength of correlation between ELISA and MSD results. Outliers for the N assays with less  
388 correlated ELISA and MSD results may be attributed to the fact that the N protein used in the  
389 ELISAs was produced in *E. coli*, whereas the MSD N protein was produced in mammalian cells,  
390 potentially causing differences in post-translational modifications and thus epitope recognition.

391

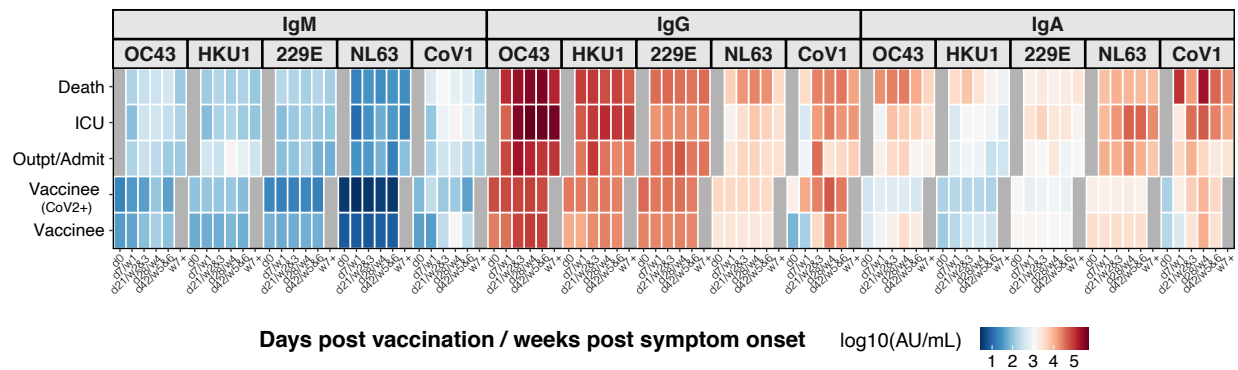

392

393 **Figure S5: Less broad serological responses to endemic HCoVs from BNT162b2 compared**  
 394 **to SARS-CoV-2 infection.** Anti-SARS-CoV S, and anti-HCoV-OC43, -HKU1, -NL63 and -229E  
 395 S IgM, IgG, and IgA antibody responses are shown for individuals who received BNT162b2 prime  
 396 (day 0) and boost (day 21) vaccination doses and for COVID-19 patients. The heatmap shows the  
 397 development of antibody responses in longitudinal samples from vaccinees/patients collected at /  
 398 during day 0, day 7 / week 1, day 21 / weeks 2&3, day 28 / week 4, day 42 / weeks 5&6, and week  
 399 7 and later after vaccination / COVID-19 symptom onset (x-axis). Individuals were classified as  
 400 outpatients (Outpt) and hospital admitted patients (Admit); intensive care unit (ICU) patients, those  
 401 who died from their illness (Death) and vaccinees who did (CoV-2+) or did not have a positive  
 402 SARS-CoV-2 test in the past. **Mean** values (as opposed to the **Median** values shown in the main  
 403 Figure 3) of log<sub>10</sub> MSD arbitrary unit (AU)/mL concentrations were used to display a color code  
 404 for each of the study groups.
